# Supplementary material for: Global variation in diabetes diagnosis and prevalence based on fasting glucose and hemoglobin A1c
Source: PubMed Central journal article supplement (PMC10667106; doi:10.1038/s41591-023-02610-2), 2023-11-09
Supplement: 41591_2023_2610_MOESM1_ESM.pdf [file 41591_2023_2610_MOESM1_ESM.pdf]

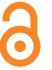

---

# Global variation in diabetes diagnosis and prevalence based on fasting glucose and hemoglobin A1c

---

In the format provided by the authors and unedited

---

**Supplementary Table 1.** List of data sources and their characteristics.

|    | Country           | Data years | Survey/Study name/Citation                                                                                                                        | Level of representative-ness | Age range used in the analysis |       | Sample size used in the analysis |        | Sample size used in the analysis with data on fasting glucose and HbA1c |       | Whether glucose was measured in a laboratory or by a POC portable device | Whether HbA1c was measured in a laboratory or by a POC portable device | Region                                     | Notes |
|----|-------------------|------------|---------------------------------------------------------------------------------------------------------------------------------------------------|------------------------------|--------------------------------|-------|----------------------------------|--------|-------------------------------------------------------------------------|-------|--------------------------------------------------------------------------|------------------------------------------------------------------------|--------------------------------------------|-------|
|    |                   |            |                                                                                                                                                   |                              | Female                         | Male  | Female                           | Male   | Female                                                                  | Male  |                                                                          |                                                                        |                                            |       |
| 1  | Australia         | 1999-2000  | The Australian Diabetes, Obesity and Lifestyle Study (AusDiab)                                                                                    | National                     | 25+                            | 25+   | 6,140                            | 5,048  | 6,103                                                                   | 5,013 | Lab                                                                      | Lab                                                                    | High-income western                        |       |
| 2  | Australia         | 1999-2003  | North West Adelaide Health Study                                                                                                                  | Community                    | 18+                            | 18+   | 2,117                            | 1,924  | 2,089                                                                   | 1,891 | Lab                                                                      | Lab                                                                    | High-income western                        |       |
| 3  | Austria           | 2010-2012  | Austrian Study on Nutritional Status 2012                                                                                                         | National                     | 18-80                          | 18-80 | 283                              | 184    | 267                                                                     | 174   | Lab                                                                      | Lab                                                                    | High-income western                        |       |
| 4  | Barbados          | 2011-2013  | Health of the Nation (HotN)                                                                                                                       | National                     | 25+                            | 25+   | 741                              | 469    | 634                                                                     | 396   | Lab                                                                      | Portable                                                               | Latin America and the Caribbean            |       |
| 5  | Belgium           | 2018-2019  | Belgian Health Examination Survey                                                                                                                 | National                     | 18+                            | 18+   | 617                              | 560    | 521                                                                     | 483   | Lab                                                                      | Lab                                                                    | High-income western                        |       |
| 6  | Brazil            | 2010-2015  | Baependi Heart Study                                                                                                                              | Community                    | 18+                            | 18+   | 1,409                            | 1,059  | 1,166                                                                   | 814   | Lab                                                                      | Lab                                                                    | Latin America and the Caribbean            |       |
| 7  | Brazil            | 2014-2015  | EpiFloripa Adults Cohort Study                                                                                                                    | Community                    | 25-65                          | 25-65 | 497                              | 366    | 410                                                                     | 298   | Lab                                                                      | Lab                                                                    | Latin America and the Caribbean            |       |
| 8  | Brunei Darussalam | 2010-2011  | National Health And Nutritional Status Survey (NHANSS)                                                                                            | National                     | 20-75                          | 20-75 | 798                              | 668    | 742                                                                     | 613   | Lab                                                                      | Lab                                                                    | East and southast Asia and the Pacific     |       |
| 9  | China             | 2009       | China Health and Nutrition Study                                                                                                                  | National                     | 18+                            | 18+   | 5,165                            | 4,814  | 4,502                                                                   | 3,997 | Lab                                                                      | Lab                                                                    | East and southast Asia and the Pacific     | 1     |
| 10 | China             | 2011-2012  | China Health and Retirement Longitudinal Study (CHARLS), baseline survey                                                                          | National                     | 45+                            | 45+   | 7,085                            | 6,426  | 4,675                                                                   | 4,059 | Lab                                                                      | Lab                                                                    | East and southast Asia and the Pacific     |       |
| 11 | Costa Rica        | 2004-2006  | Costa Rican Longevity and Healthy Aging Study Pre-1945 Cohort Wave 1                                                                              | National                     | 60+                            | 60+   | 1,529                            | 1,283  | 1,415                                                                   | 1,174 | Lab                                                                      | Lab                                                                    | Latin America and the Caribbean            |       |
| 12 | Czech Republic    | 2002-2005  | Health, Alcohol and Psychosocial Factors In Eastern Europe (HAPIEE)                                                                               | Subnational                  | 45-70                          | 45-70 | 4,675                            | 4,068  | 432                                                                     | 414   | Lab                                                                      | Lab                                                                    | Central and eastern Europe                 |       |
| 13 | Czech Republic    | 2015-2018  | Czech post-MONICA                                                                                                                                 | National                     | 25-64                          | 25-64 | 1,343                            | 1,222  | 1,324                                                                   | 1,208 | Lab                                                                      | Lab                                                                    | Central and eastern Europe                 |       |
| 14 | Finland           | 2000-2001  | Health 2000 Survey                                                                                                                                | National                     | 30+                            | 30+   | 4,035                            | 3,308  | 2,210                                                                   | 1,861 | Lab                                                                      | Lab                                                                    | High-income western                        |       |
| 15 | Finland           | 2011       | Young Finns Study 2011 (rural)                                                                                                                    | National                     | 34-49                          | 34-49 | 435                              | 367    | 420                                                                     | 363   | Lab                                                                      | Lab                                                                    | High-income western                        |       |
| 16 | Finland           | 2011       | Young Finns Study 2011 (urban)                                                                                                                    | National                     | 34-49                          | 34-49 | 646                              | 514    | 624                                                                     | 495   | Lab                                                                      | Lab                                                                    | High-income western                        |       |
| 17 | Finland           | 2011-2012  | Health 2011 Survey                                                                                                                                | National                     | 30+                            | 30+   | 542                              | 448    | 146                                                                     | 120   | Lab                                                                      | Lab                                                                    | High-income western                        |       |
| 18 | Finland           | 2012       | Northern Finland Birth Cohort 1966                                                                                                                | Community                    | 45-47                          | 45-47 | 2,804                            | 2,189  | 2,430                                                                   | 1,871 | Lab                                                                      | Lab                                                                    | High-income western                        |       |
| 19 | Finland           | 2017       | The FinHealth Survey                                                                                                                              | National                     | 18+                            | 18+   | 3,637                            | 3,231  | 1,438                                                                   | 1,326 | Lab                                                                      | Lab                                                                    | High-income western                        |       |
| 20 | Finland           | 2018-2019  | Savitaipale Study, 22-year Follow-up                                                                                                              | Community                    | 62-86                          | 62-86 | 347                              | 268    | 339                                                                     | 262   | Lab                                                                      | Lab                                                                    | High-income western                        |       |
| 21 | Finland           | 2019-2020  | Northern Finland Birth Cohort 1986                                                                                                                | Community                    | 33-35                          | 33-35 | 875                              | 530    | 873                                                                     | 529   | Lab                                                                      | Lab                                                                    | High-income western                        |       |
| 22 | France            | 2008-2010  | The Three City Study                                                                                                                              | Community                    | 73+                            | 73+   | 2,984                            | 1,650  | 443                                                                     | 249   | Lab                                                                      | Lab                                                                    | High-income western                        |       |
| 23 | Germany           | 2000-2002  | Epidemiological study of the chances of prevention, early recognition and optimal treatment of chronic diseases in an elderly population (ESTHER) | Subnational                  | 50-75                          | 50-75 | 5,321                            | 4,365  | 4,393                                                                   | 3,541 | Lab                                                                      | Lab                                                                    | High-income western                        |       |
| 24 | Germany           | 2000-2003  | Heinz Nixdorf Recall Study                                                                                                                        | Subnational                  | 45-75                          | 45-75 | 2,416                            | 2,394  | 1,551                                                                   | 1,564 | Lab                                                                      | Lab                                                                    | High-income western                        | 2     |
| 25 | Germany           | 2008-2012  | Study of Health in Pomerania, second cohort (SHIP-TREND)                                                                                          | Subnational                  | 20-79                          | 20-79 | 2,228                            | 2,096  | 1,462                                                                   | 1,242 | Lab                                                                      | Lab                                                                    | High-income western                        |       |
| 26 | Ghana             | 2012-2014  | Research on Obesity and Diabetes among African Migrants (RODAM), control group (rural)                                                            | Subnational                  | 25+                            | 25+   | 634                              | 407    | 453                                                                     | 273   | Lab                                                                      | Lab                                                                    | Sub-Saharan Africa                         |       |
| 27 | Ghana             | 2012-2014  | Research on Obesity and Diabetes among African Migrants (RODAM), control group (urban)                                                            | Subnational                  | 25+                            | 25+   | 1,007                            | 394    | 975                                                                     | 386   | Lab                                                                      | Lab                                                                    | Sub-Saharan Africa                         |       |
| 28 | Greenland         | 2005-2010  | Population Health Survey in Greenland                                                                                                             | National                     | 18+                            | 18+   | 1,726                            | 1,351  | 1,706                                                                   | 1,330 | Lab                                                                      | Lab                                                                    | High-income western                        |       |
| 29 | Greenland         | 2016-2019  | Population Health Survey in Greenland                                                                                                             | National                     | 25+                            | 25+   | 1,046                            | 833    | 763                                                                     | 573   | Lab                                                                      | Lab                                                                    | High-income western                        |       |
| 30 | Guatemala         | 2015-2017  | Nutrition on early childhood and metabolomic and cardiometabolic profile on adulthood (META)                                                      | Community                    | 37-55                          | 37-55 | 310                              | 213    | 302                                                                     | 207   | Lab                                                                      | Lab                                                                    | Latin America and the Caribbean            |       |
| 31 | Guyana            | 2016       | STEPS                                                                                                                                             | National                     | 18-69                          | 18-69 | 1,585                            | 1,068  | 405                                                                     | 238   | Portable                                                                 | Lab                                                                    | Latin America and the Caribbean            |       |
| 32 | India             | 2001-2004  | Chennai Urban Rural Epidemiology Study                                                                                                            | Community                    | 20+                            | 20+   | 1,254                            | 1,096  | 1,238                                                                   | 1,090 | Lab                                                                      | Lab                                                                    | South Asia                                 |       |
| 33 | India             | 2007-2008  | Urban population in Hyderabad                                                                                                                     | Community                    | 20-60                          | 20-60 | 1,552                            | 1,512  | 58                                                                      | 66    | Portable                                                                 | Portable                                                               | South Asia                                 |       |
| 34 | India             | 2008-2010  | ICMR-India Diabetes (INDIAB) Study, Phase I                                                                                                       | National                     | 20+                            | 20+   | 6,401                            | 6,457  | 1,128                                                                   | 1,328 | Portable                                                                 | Lab                                                                    | South Asia                                 |       |
| 35 | India             | 2010-2012  | Centre for cArdiometabolic Risk Reduction in South-Asia (CARRS) - Surveillance Study                                                              | Community                    | 20+                            | 20+   | 6,403                            | 5,867  | 5,417                                                                   | 4,704 | Lab                                                                      | Lab                                                                    | South Asia                                 | 3     |
| 36 | India             | 2012-2013  | ICMR-India Diabetes (INDIAB) Study, Phase II                                                                                                      | Subnational                  | 20+                            | 20+   | 10,439                           | 7,859  | 2,149                                                                   | 2,173 | Portable                                                                 | Lab                                                                    | South Asia                                 |       |
| 37 | India             | 2012-2015  | ICMR-India Diabetes (INDIAB) Study, North East Phase                                                                                              | Subnational                  | 20+                            | 20+   | 12,281                           | 10,032 | 2,275                                                                   | 2,566 | Portable                                                                 | Lab                                                                    | South Asia                                 |       |
| 38 | India             | 2014-2015  | Control of Hypertension In Rural India (CHIRI) - Rishi Valley                                                                                     | Community                    | 18+                            | 18+   | 3,507                            | 2,581  | 999                                                                     | 686   | Portable                                                                 | Portable                                                               | South Asia                                 |       |
| 39 | Iran              | 2013-2014  | Gilan Eye Study                                                                                                                                   | Subnational                  | 50+                            | 50+   | 1,472                            | 1,095  | 1,159                                                                   | 840   | Lab                                                                      | Lab                                                                    | Central Asia, Middle East and north Africa |       |
| 40 | Iran              | 2016       | Iran STEPS 2016                                                                                                                                   | National                     | 25+                            | 25+   | 13,843                           | 13,038 | 10,017                                                                  | 8,704 | Lab                                                                      | Lab                                                                    | Central Asia, Middle East and north Africa |       |
| 41 | Iran              | 2020-2021  | STEPS                                                                                                                                             | National                     | 25+                            | 25+   | 13,979                           | 11,202 | 10,212                                                                  | 7,770 | Lab                                                                      | Lab                                                                    | Central Asia, Middle East and north Africa |       |
| 42 | Italy             | 2000       | Bruneck Study                                                                                                                                     | Community                    | 50-89                          | 50-89 | 361                              | 331    | 361                                                                     | 331   | Lab                                                                      | Lab                                                                    | High-income western                        |       |
| 43 | Jamaica           | 2016-2017  | Jamaica Health and Lifestyle Survey                                                                                                               | National                     | 18+                            | 18+   | 1,635                            | 1,028  | 998                                                                     | 574   | Portable                                                                 | Portable                                                               | Latin America and the Caribbean            |       |
| 44 | Jordan            | 2016-2017  | National Cardiovascular Diseases and Diabetes Study (NCDDS)                                                                                       | National                     | 18+                            | 18+   | 2,763                            | 1,182  | 2,696                                                                   | 1,166 | Portable                                                                 | Lab                                                                    | Central Asia, Middle East and north Africa |       |
| 45 | Kazakhstan        | 2019       | A health status assessment of a population of Karaganda urban region                                                                              | Community                    | 18+                            | 18+   | 672                              | 326    | 664                                                                     | 316   | Lab                                                                      | Lab                                                                    | Central Asia, Middle East and north Africa |       |

|    | Country            | Data years | Survey/Study name/Citation                                                                                                                                                    | Level of representative-ness | Age range used in the analysis |       | Sample size used in the analysis |       | Sample size used in the analysis with data on fasting glucose and HbA1c |       | Whether glucose was measured in a laboratory or by a POC portable device | Whether HbA1c was measured in a laboratory or by a POC portable device | Region                                     | Notes |
|----|--------------------|------------|-------------------------------------------------------------------------------------------------------------------------------------------------------------------------------|------------------------------|--------------------------------|-------|----------------------------------|-------|-------------------------------------------------------------------------|-------|--------------------------------------------------------------------------|------------------------------------------------------------------------|--------------------------------------------|-------|
|    |                    |            |                                                                                                                                                                               |                              | Female                         | Male  | Female                           | Male  | Female                                                                  | Male  |                                                                          |                                                                        |                                            |       |
| 46 | Kazakhstan         | 2021       | Prevalence of NCD Risk Factors in Kazakhstan                                                                                                                                  | Subnational                  | 18-69                          | 18-69 | 814                              | 802   | 813                                                                     | 802   | Lab                                                                      | Lab                                                                    | Central Asia, Middle East and north Africa | 4     |
| 47 | Kuwait             | 2008-2009  | National Nutrition Program for the State of Kuwait                                                                                                                            | National                     | 18-86                          | 18-86 | 530                              | 459   | 475                                                                     | 412   | Lab                                                                      | Lab                                                                    | Central Asia, Middle East and north Africa |       |
| 48 | Kuwait             | 2011-2014  | Kuwait Diabetes Epidemiology Program                                                                                                                                          | National                     | 18-82                          | 18-82 | 2,143                            | 2,783 | 2,137                                                                   | 2,776 | Lab                                                                      | Lab                                                                    | Central Asia, Middle East and north Africa |       |
| 49 | Kuwait             | 2014       | STEPS                                                                                                                                                                         | National                     | 18-69                          | 18-69 | 2,405                            | 1,456 | 1,574                                                                   | 955   | Lab                                                                      | Lab                                                                    | Central Asia, Middle East and north Africa |       |
| 50 | Malaysia           | 2008       | Metabolic Syndrome Study in Malaysia (rural)                                                                                                                                  | National                     | 18+                            | 18+   | 1,368                            | 754   | 1,253                                                                   | 686   | Lab                                                                      | Lab                                                                    | East and southast Asia and the Pacific     |       |
| 51 | Malaysia           | 2008       | Metabolic Syndrome Study in Malaysia (urban)                                                                                                                                  | National                     | 18+                            | 18+   | 1,449                            | 769   | 1,397                                                                   | 733   | Lab                                                                      | Lab                                                                    | East and southast Asia and the Pacific     |       |
| 52 | Mauritius          | 2015       | Mauritius Noncommunicable Disease Survey                                                                                                                                      | National                     | 20-74                          | 20-74 | 1,954                            | 1,626 | 1,952                                                                   | 1,622 | Lab                                                                      | Lab                                                                    | Sub-Saharan Africa                         |       |
| 53 | Mauritius          | 2015       | Mauritius Noncommunicable Disease Survey 1998 Follow Up                                                                                                                       | National                     | 20+                            | 20+   | 1,182                            | 887   | 1,179                                                                   | 886   | Lab                                                                      | Lab                                                                    | Sub-Saharan Africa                         |       |
| 54 | Mexico             | 2016       | Encuesta Nacional de Salud y Nutricion                                                                                                                                        | National                     | 20+                            | 20+   | 5,477                            | 2,865 | 2,437                                                                   | 1,314 | Lab                                                                      | Lab                                                                    | Latin America and the Caribbean            |       |
| 55 | Mexico             | 2018-2019  | Encuesta Nacional de Salud y Nutricion                                                                                                                                        | National                     | 20+                            | 20+   | 9,798                            | 7,584 | 7,311                                                                   | 5,418 | Lab                                                                      | Lab                                                                    | Latin America and the Caribbean            |       |
| 56 | Mexico             | 2021       | Encuesta Nacional de Salud y Nutricion                                                                                                                                        | National                     | 20+                            | 20+   | 5,243                            | 2,947 | 1,304                                                                   | 748   | Lab                                                                      | Lab                                                                    | Latin America and the Caribbean            |       |
| 57 | Pakistan           | 2016-2017  | National Diabetes Survey of Pakistan                                                                                                                                          | National                     | 20+                            | 20+   | 5,715                            | 4,448 | 4,261                                                                   | 3,273 | Lab                                                                      | Lab                                                                    | South Asia                                 |       |
| 58 | Panama             | 2010-2011  | Prevalencia de factores de riesgo asociados a enfermedad cardiovascular                                                                                                       | Subnational                  | 18+                            | 18+   | 2,478                            | 1,074 | 2,477                                                                   | 1,073 | Lab                                                                      | Lab                                                                    | Latin America and the Caribbean            |       |
| 59 | Panama             | 2019       | Encuesta Nacional de Salud de Panama (ENSPA)                                                                                                                                  | National                     | 18+                            | 18+   | 12,014                           | 4,846 | 3,754                                                                   | 1,110 | Lab                                                                      | Lab                                                                    | Latin America and the Caribbean            |       |
| 60 | Peru               | 2007-2008  | PERU MIGRANT Study                                                                                                                                                            | Community                    | 30+                            | 30+   | 522                              | 466   | 521                                                                     | 466   | Lab                                                                      | Lab                                                                    | Latin America and the Caribbean            |       |
| 61 | Peru               | 2009-2012  | CRONICAS Cohort Study                                                                                                                                                         | Subnational                  | 35+                            | 35+   | 1,849                            | 1,740 | 1,596                                                                   | 1,518 | Lab                                                                      | Lab                                                                    | Latin America and the Caribbean            |       |
| 62 | Peru               | 2016-2017  | Scceening of T2DM                                                                                                                                                             | Community                    | 30-70                          | 30-70 | 810                              | 799   | 810                                                                     | 799   | Lab                                                                      | Lab                                                                    | Latin America and the Caribbean            |       |
| 63 | Poland             | 2002-2005  | Health, Alcohol and Psychosocial Factors In Eastern Europe (HAPIEE)                                                                                                           | Community                    | 45-70                          | 45-70 | 5,485                            | 5,220 | 469                                                                     | 478   | Lab                                                                      | Lab                                                                    | Central and eastern Europe                 |       |
| 64 | Poland             | 2011       | NATPOL                                                                                                                                                                        | National                     | 18-79                          | 18-79 | 1,209                            | 1,143 | 1,066                                                                   | 991   | Lab                                                                      | Lab                                                                    | Central and eastern Europe                 |       |
| 65 | Poland             | 2015-2016  | LIPIDOGRAM2015 & LIPIDOGEN2015 Study - National epidemiological study of lipid disorders and selected risk factors of cardiovascular disease in primary health care in Poland | National                     | 18+                            | 18+   | 8,690                            | 5,034 | 1,075                                                                   | 713   | Portable                                                                 | Lab                                                                    | Central and eastern Europe                 |       |
| 66 | Romania            | 2011-2012  | Study for the Evaluation of Prevalence of Hypertension and cArdivascular Risk among the Adult Population of Romania - SEPHAR II                                               | National                     | 18-80                          | 18-80 | 1,038                            | 932   | 1,034                                                                   | 928   | Lab                                                                      | Lab                                                                    | Central and eastern Europe                 |       |
| 67 | Romania            | 2015-2016  | Study for the Evaluation of Prevalence of Hypertension and cArdivascular Risk among the Adult Population of Romania - SEPHAR III                                              | National                     | 18-80                          | 18-80 | 1,034                            | 936   | 1,033                                                                   | 935   | Lab                                                                      | Lab                                                                    | Central and eastern Europe                 |       |
| 68 | Russian Federation | 2002-2005  | Health, Alcohol and Psychosocial Factors In Eastern Europe (HAPIEE)                                                                                                           | Community                    | 45-70                          | 45-70 | 5,079                            | 4,244 | 480                                                                     | 720   | Lab                                                                      | Lab                                                                    | Central and eastern Europe                 |       |
| 69 | Seychelles         | 2013-2014  | Seychelles Heart Survey IV                                                                                                                                                    | National                     | 25-64                          | 25-64 | 699                              | 531   | 686                                                                     | 526   | Portable                                                                 | Lab                                                                    | Sub-Saharan Africa                         |       |
| 70 | Somalia            | 2016       | The prevalence of selected risk factors for non-communicable diseases in Hargeisa, Somaliland: a cross-sectional study                                                        | Community                    | 20-69                          | 20-69 | 955                              | 145   | 510                                                                     | 57    | Lab                                                                      | Lab                                                                    | Sub-Saharan Africa                         |       |
| 71 | South Africa       | 2008-2009  | Cape Town Bellville South Cohort Study - Baseline evaluation I                                                                                                                | Community                    | 35-65                          | 35-65 | 494                              | 140   | 493                                                                     | 138   | Lab                                                                      | Lab                                                                    | Sub-Saharan Africa                         |       |
| 72 | South Korea        | 2011       | Korea National Health and Nutrition Examination Survey                                                                                                                        | National                     | 18+                            | 18+   | 3,479                            | 2,599 | 3,270                                                                   | 2,464 | Lab                                                                      | Lab                                                                    | East and southast Asia and the Pacific     |       |
| 73 | South Korea        | 2012       | Korea National Health and Nutrition Examination Survey                                                                                                                        | National                     | 18+                            | 18+   | 3,301                            | 2,349 | 3,038                                                                   | 2,215 | Lab                                                                      | Lab                                                                    | East and southast Asia and the Pacific     |       |
| 74 | South Korea        | 2013       | Korea National Health and Nutrition Examination Survey                                                                                                                        | National                     | 18+                            | 18+   | 3,115                            | 2,303 | 2,764                                                                   | 2,136 | Lab                                                                      | Lab                                                                    | East and southast Asia and the Pacific     |       |
| 75 | South Korea        | 2014       | Korea National Health and Nutrition Examination Survey                                                                                                                        | National                     | 18+                            | 18+   | 2,943                            | 2,115 | 2,591                                                                   | 1,909 | Lab                                                                      | Lab                                                                    | East and southast Asia and the Pacific     |       |
| 76 | South Korea        | 2015       | Korea National Health and Nutrition Examination Survey                                                                                                                        | National                     | 18+                            | 18+   | 2,963                            | 2,308 | 2,685                                                                   | 2,135 | Lab                                                                      | Lab                                                                    | East and southast Asia and the Pacific     |       |
| 77 | South Korea        | 2016       | Korea National Health and Nutrition Examination Survey                                                                                                                        | National                     | 18+                            | 18+   | 3,473                            | 2,682 | 3,216                                                                   | 2,529 | Lab                                                                      | Lab                                                                    | East and southast Asia and the Pacific     |       |
| 78 | South Korea        | 2017       | Korea National Health and Nutrition Examination Survey                                                                                                                        | National                     | 18+                            | 18+   | 3,438                            | 2,780 | 3,183                                                                   | 2,623 | Lab                                                                      | Lab                                                                    | East and southast Asia and the Pacific     |       |
| 79 | South Korea        | 2018       | Korea National Health and Nutrition Examination Survey                                                                                                                        | National                     | 18+                            | 18+   | 3,521                            | 2,763 | 3,321                                                                   | 2,625 | Lab                                                                      | Lab                                                                    | East and southast Asia and the Pacific     |       |
| 80 | South Korea        | 2019       | Korea National Health and Nutrition Examination Survey                                                                                                                        | National                     | 18+                            | 18+   | 3,504                            | 2,835 | 3,333                                                                   | 2,679 | Lab                                                                      | Lab                                                                    | East and southast Asia and the Pacific     |       |
| 81 | South Korea        | 2020       | Korea National Health and Nutrition Examination Survey                                                                                                                        | National                     | 18+                            | 18+   | 3,283                            | 2,685 | 3,128                                                                   | 2,563 | Lab                                                                      | Lab                                                                    | East and southast Asia and the Pacific     |       |
| 82 | Spain              | 2001-2003  | Diabetes, Nutricion y Obesidad en la poblacion adulta de la Region de Murcia (DINO)                                                                                           | Subnational                  | 20+                            | 20+   | 837                              | 719   | 834                                                                     | 715   | Lab                                                                      | Lab                                                                    | High-income western                        |       |
| 83 | Spain              | 2004       | Vioque J et al., Obesity 16(3):664-70, 2008                                                                                                                                   | Community                    | 24+                            | 24+   | 117                              | 85    | 90                                                                      | 64    | Portable                                                                 | Portable                                                               | High-income western                        |       |

|     | Country                  | Data years | Survey/Study name/Citation                                                       | Level of representative-ness | Age range used in the analysis |       | Sample size used in the analysis |       | Sample size used in the analysis with data on fasting glucose and HbA1c |       | Whether glucose was measured in a laboratory or by a POC portable device | Whether HbA1c was measured in a laboratory or by a POC portable device | Region                                     | Notes |
|-----|--------------------------|------------|----------------------------------------------------------------------------------|------------------------------|--------------------------------|-------|----------------------------------|-------|-------------------------------------------------------------------------|-------|--------------------------------------------------------------------------|------------------------------------------------------------------------|--------------------------------------------|-------|
|     |                          |            |                                                                                  |                              | Female                         | Male  | Female                           | Male  | Female                                                                  | Male  |                                                                          |                                                                        |                                            |       |
| 84  | Spain                    | 2007-2009  | Harmonizing Equation of Risk in Mediterranean countries Extremadura (HERMEX)     | Subnational                  | 25-79                          | 25-79 | 1,498                            | 1,298 | 1,491                                                                   | 1,296 | Lab                                                                      | Lab                                                                    | High-income western                        |       |
| 85  | Spain                    | 2008-2010  | Study on Nutrition and Cardiovascular Risk in Spain                              | National                     | 18+                            | 18+   | 6,803                            | 6,124 | 6,685                                                                   | 6,029 | Lab                                                                      | Lab                                                                    | High-income western                        |       |
| 86  | Spain                    | 2016-2017  | Estudio de Nutricion y Riesgo Cardiovascular en Espana (ENRICA) - Seniors cohort | Subnational                  | 65+                            | 65+   | 1,739                            | 1,532 | 542                                                                     | 577   | Lab                                                                      | Lab                                                                    | High-income western                        |       |
| 87  | Suriname                 | 2013-2015  | The Healthy Life in Suriname Study (HELISUR)                                     | Subnational                  | 18-70                          | 18-70 | 722                              | 424   | 673                                                                     | 406   | Lab                                                                      | Lab                                                                    | Latin America and the Caribbean            |       |
| 88  | Taiwan                   | 2000       | Social Environment and Biomarkers of Aging Study                                 | National                     | 54-80                          | 54-80 | 433                              | 590   | 432                                                                     | 589   | Lab                                                                      | Lab                                                                    | East and southast Asia and the Pacific     |       |
| 89  | Taiwan                   | 2006       | Social Environment and Biomarkers of Aging Study                                 | National                     | 53-60                          | 53-60 | 274                              | 253   | 202                                                                     | 195   | Lab                                                                      | Lab                                                                    | East and southast Asia and the Pacific     |       |
| 90  | Thailand                 | 2019-2020  | Thailand National Health Examination Survey VI                                   | National                     | 18+                            | 18+   | 12,375                           | 8,906 | 12,358                                                                  | 8,891 | Lab                                                                      | Lab                                                                    | East and southast Asia and the Pacific     |       |
| 91  | Turkey                   | 2012-2013  | Turkish Adult Risk Factor Study                                                  | National                     | 37+                            | 37+   | 1,115                            | 1,030 | 219                                                                     | 206   | Lab                                                                      | Lab                                                                    | Central Asia, Middle East and north Africa |       |
| 92  | United Kingdom           | 2003       | Health Survey for England                                                        | National                     | 18+                            | 18+   | 7,823                            | 6,408 | 447                                                                     | 380   | Lab                                                                      | Lab                                                                    | High-income western                        |       |
| 93  | United Kingdom           | 2003-2005  | Hertfordshire Ageing Study                                                       | Subnational                  | 72-82                          | 72-82 | 151                              | 208   | 116                                                                     | 169   | Lab                                                                      | Lab                                                                    | High-income western                        |       |
| 94  | United Kingdom           | 2004-2005  | English Longitudinal Study of Ageing Wave 2                                      | National                     | 52-80                          | 52-80 | 3,716                            | 3,153 | 1,858                                                                   | 1,569 | Lab                                                                      | Lab                                                                    | High-income western                        |       |
| 95  | United Kingdom           | 2006-2007  | Newcastle 85+ Study                                                              | Community                    | 84-86                          | 84-86 | 526                              | 321   | 431                                                                     | 283   | Lab                                                                      | Lab                                                                    | High-income western                        | 5     |
| 96  | United Kingdom           | 2008-2009  | English Longitudinal Study of Ageing Wave 4                                      | National                     | 50+                            | 50+   | 1,815                            | 1,590 | 850                                                                     | 757   | Lab                                                                      | Lab                                                                    | High-income western                        |       |
| 97  | United Kingdom           | 2006-2010  | MRC National Survey of Health and Development                                    | National                     | 60-65                          | 60-65 | 1,066                            | 966   | 920                                                                     | 837   | Lab                                                                      | Lab                                                                    | High-income western                        |       |
| 98  | United Kingdom           | 2008-2012  | National Diet and Nutrition Survey                                               | National                     | 18+                            | 18+   | 1,216                            | 874   | 903                                                                     | 669   | Lab                                                                      | Lab                                                                    | High-income western                        |       |
| 99  | United Kingdom           | 2012-2013  | English Longitudinal Study of Ageing Wave 6                                      | National                     | 50-88                          | 50-89 | 1,377                            | 1,214 | 280                                                                     | 222   | Lab                                                                      | Lab                                                                    | High-income western                        |       |
| 100 | United Kingdom           | 2013-2014  | National Diet and Nutrition Survey                                               | National                     | 18+                            | 18+   | 514                              | 328   | 401                                                                     | 276   | Lab                                                                      | Lab                                                                    | High-income western                        |       |
| 101 | United Kingdom           | 2015-2016  | National Diet and Nutrition Survey                                               | National                     | 18+                            | 18+   | 468                              | 339   | 364                                                                     | 267   | Lab                                                                      | Lab                                                                    | High-income western                        |       |
| 102 | United Kingdom           | 2016-2019  | National Diet and Nutrition Survey                                               | National                     | 18+                            | 18+   | 420                              | 301   | 312                                                                     | 234   | Lab                                                                      | Lab                                                                    | High-income western                        |       |
| 103 | United Kingdom           | 2018-2019  | English Longitudinal Study of Ageing Wave 9                                      | National                     | 50-88                          | 50-85 | 812                              | 748   | 294                                                                     | 186   | Lab                                                                      | Lab                                                                    | High-income western                        |       |
| 104 | United States of America | 1999-2000  | US NHANES 1999-2000                                                              | National                     | 18+                            | 18+   | 2,586                            | 2,547 | 975                                                                     | 983   | Lab                                                                      | Lab                                                                    | High-income western                        |       |
| 105 | United States of America | 2001-2002  | US NHANES 2001-2002                                                              | National                     | 18+                            | 18+   | 2,800                            | 2,844 | 1,126                                                                   | 1,188 | Lab                                                                      | Lab                                                                    | High-income western                        |       |
| 106 | United States of America | 2003-2004  | US NHANES 2003-2004                                                              | National                     | 18+                            | 18+   | 2,654                            | 2,695 | 1,047                                                                   | 1,073 | Lab                                                                      | Lab                                                                    | High-income western                        |       |
| 107 | United States of America | 2005-2006  | US NHANES 2005-2006                                                              | National                     | 18+                            | 18+   | 2,521                            | 2,671 | 976                                                                     | 1,093 | Lab                                                                      | Lab                                                                    | High-income western                        |       |
| 108 | United States of America | 2007-2008  | US NHANES 2007-2008                                                              | National                     | 18+                            | 18+   | 3,101                            | 3,064 | 1,238                                                                   | 1,231 | Lab                                                                      | Lab                                                                    | High-income western                        |       |
| 109 | United States of America | 2009-2010  | US NHANES 2009-2010                                                              | National                     | 18+                            | 18+   | 3,281                            | 3,174 | 1,432                                                                   | 1,297 | Lab                                                                      | Lab                                                                    | High-income western                        |       |
| 110 | United States of America | 2011-2013  | Atherosclerosis Risk in Communities Study (ARIC)                                 | Subnational                  | 67-90                          | 67-90 | 943                              | 772   | 880                                                                     | 736   | Lab                                                                      | Lab                                                                    | High-income western                        |       |
| 111 | United States of America | 2011-2012  | US NHANES 2011-2012                                                              | National                     | 18+                            | 18+   | 2,908                            | 2,894 | 1,196                                                                   | 1,217 | Lab                                                                      | Lab                                                                    | High-income western                        |       |
| 112 | United States of America | 2013-2014  | US NHANES 2013-2014                                                              | National                     | 18+                            | 18+   | 3,129                            | 2,916 | 1,305                                                                   | 1,201 | Lab                                                                      | Lab                                                                    | High-income western                        |       |
| 113 | United States of America | 2015-2016  | US NHANES 2015-2016                                                              | National                     | 18+                            | 18+   | 3,033                            | 2,885 | 1,201                                                                   | 1,153 | Lab                                                                      | Lab                                                                    | High-income western                        |       |
| 114 | United States of America | 2017-2018  | US NHANES 2017-2018                                                              | National                     | 18+                            | 18+   | 2,958                            | 2,839 | 1,236                                                                   | 1,143 | Lab                                                                      | Lab                                                                    | High-income western                        |       |
| 115 | United States of America | 2019-2020  | US NHANES 2019-2020                                                              | Subnational                  | 18+                            | 18+   | 1,926                            | 1,878 | 784                                                                     | 762   | Lab                                                                      | Lab                                                                    | High-income western                        |       |
| 116 | Venezuela                | 2014-2017  | Maracaibo aging study Santa Rosa cohort                                          | Community                    | 37+                            | 37+   | 291                              | 116   | 244                                                                     | 97    | Lab                                                                      | Lab                                                                    | Latin America and the Caribbean            |       |
| 117 | Viet Nam                 | 2008-2009  | The Survey on Diabetes and Its Risk Factors                                      | Subnational                  | 25+                            | 25+   | 1,455                            | 833   | 1,298                                                                   | 751   | Lab                                                                      | Lab                                                                    | East and southast Asia and the Pacific     |       |

1 This research uses data from China Health and Nutrition Survey (CHNS). We thank the National Institute of Nutrition and Food Safety, China Center for Disease Control and Prevention, Carolina Population Center (5 R24 HD050924), the University of North Carolina at Chapel Hill, the NIH (R01 -HD30880, DK056350, R24-HD050924, and R01-HD38700) and the Fogarty International Center, NIH for financial support for the CHNS data collection and analysis files from 1989 to 2011 and future surveys, and the China-Japan Friendship Hospital, Ministry of Health for support for CHNS 2009.

2 The authors thank the Heinz Nixdorf Foundation [Chairman: Martin Nixdorf; Past Chairman: Dr jur. Gerhard Schmidt], for their generous support of this study. Parts of the study were also supported by the German Research Council (DFG) [DFG project: El 969/2-3, ER 155/6-1;6-2, HO 3314/2-1;2-2;3-4-3, INST 58219/32-1, JO 170/8-1, KN 885/3-1, PE 2309/2-1, SI 236/8-1;9-1;10-1.], the German Ministry of Education and Science [BMBF project: 01EG0401, 01GI0856, 01GI0860, 01GS0820\_WB2-C, 01ER1001D, 01GI0205], the Ministry of Innovation, Science, Research and Technology, North Rhine-Westphalia (MIWFT-NRW), the Elise Kröner-Fresenius-Stiftung [project: 2015\_A119] and the German Social Accident Insurance [DGUV project: FF-FP295]. Furthermore the study was supported by the Competence Network for HIV/AIDS, the deanship of the University Hospital and IFORES of the University Duisburg-Essen, the European Union, the German Competence Network Heart Failure, Kulturstiftung Essen, the Protein Research Unit within Europe (PURE), the Dr. Werner-Jackstädt Stiftung and the following companies: Celgene GmbH München, Imatron/GE-Imatron, Janssen, Merck KG, Philips, ResMed Foundation, Roche Diagnostics, Sarstedt AG&Co, Siemens HealthCare Diagnostics, Volkswagen Foundation. The authors express their gratitude to all study participants of the Heinz Nixdorf Recall (HNR) Study, the personnel of the HNR study center and the EBT-scanner facilities, the investigative group and all former employees of the HNR study. The authors also thank the Advisory Board of the HNR Study: T. Meinertz, Hamburg, Germany (Chair); C. Bode, Freiburg, Germany; P.J. de Feyter, Rotterdam, Netherlands; B. Güntert, Hall i.T., Austria; F. Gutzwiller, Bern, Switzerland; H. Heinen, Bonn, Germany; O. Hess (†), Bern, Switzerland; B. Klein (†), Essen, Germany; H. Löwel, Neuherberg, Germany; M. Reiser, Munich, Germany; G. Schmidt (†), Essen, Germany; M. Schwaiger, Munich, Germany; C. Steinmüller, Bonn, Germany; T. Theorell, Stockholm, Sweden; and S.N Willich, Berlin, Germany.

3 The CARRS Study was funded in part by the National Heart, Lung, and Blood Institute (NHLBI), National Institutes of Health (NIH), Department of Health and Human Services, under Contract No. HHSN268200900026C, the United Health Group, Minneapolis, MN, USA, and by the the National Heart, Lung, And Blood Institute of the National Institutes of Health under Award Number P01HL154996.

4 The study was supported by the grant of the Ministry of Healthcare of the Republic of Kazakhstan "National Programme for the Introduction of Personalized and Preventive Medicine in The Republic of Kazakhstan (2021–2023)" (Grant number OR12165486).

5 The Newcastle 85+ Study has been funded by the Medical Research Council, Biotechnology and Biological Sciences Research Council, the Dunhill Medical Trust and the National Institute for Health Research School for Primary Care. Parts of the work have also been funded by the British Heart Foundation, Unilever Corporate Research, Newcastle University, NHS North of Tyne (Newcastle Primary Care Trust). Mortality data was obtained from NHS Digital. We acknowledge the operational support of the North of England Commissioning Support Unit, the National Institute for Health Research Clinical Research Network North East and North Cumbria, local general practitioners and their staff. We thank the research nurses, laboratory technicians, data management and clerical team for their work throughout, as well as many colleagues for their expert advice. Thanks are due especially to the study participants and, where appropriate, their families and carers
